# Supplementary material for: Advancing the functional utility of PAR-CLIP by quantifying background binding to mRNAs and lncRNAs
Source: PubMed Central journal article supplement (PMC4053780; doi:10.1186/gb-2014-15-1-r2), 2014-01-07

A)

## Multivariate

## Correlations

|                | log(G45 reads) | log(G35 reads) | log(G20 reads) |
|----------------|----------------|----------------|----------------|
| log(G45 reads) | 1.0000         | 0.6954         | 0.6483         |
| log(G35 reads) | 0.6954         | 1.0000         | 0.6725         |
| log(G20 reads) | 0.6483         | 0.6725         | 1.0000         |

## Scatterplot Matrix

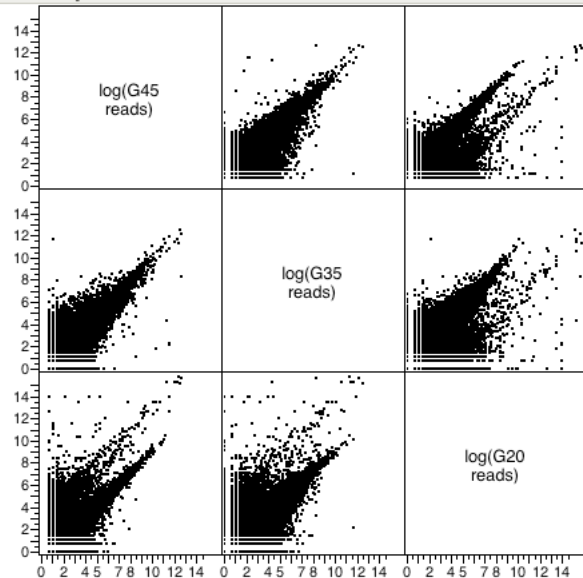

B)

## Multivariate

## Correlations

|                             | log(union HuR reads) | log(union background reads) |
|-----------------------------|----------------------|-----------------------------|
| log(union HuR reads)        | 1.0000               | 0.2961                      |
| log(union background reads) | 0.2961               | 1.0000                      |

## Scatterplot Matrix

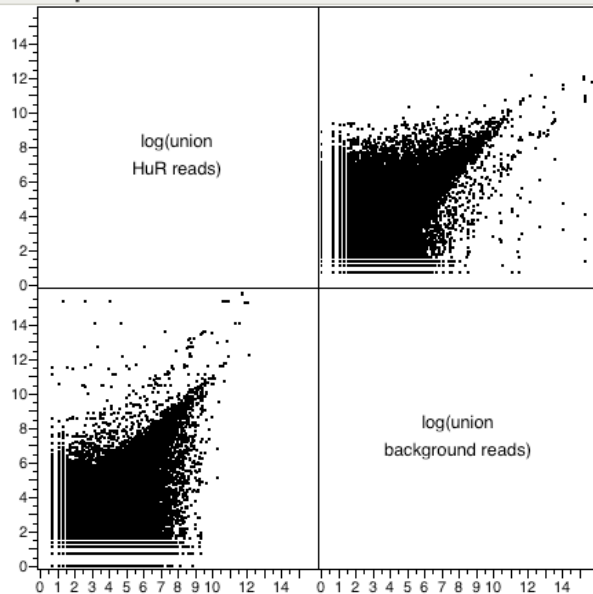

Supplement: gb-2014-15-1-r2-S2.pdf [file gb-2014-15-1-r2-S2.pdf]
