# Supplementary material for: Advancing the functional utility of PAR-CLIP by quantifying background binding to mRNAs and lncRNAs
Source: PubMed Central journal article supplement (PMC4053780; doi:10.1186/gb-2014-15-1-r2), 2014-01-07

# MALAT1 (chr11:65,265,000-65,274,100)

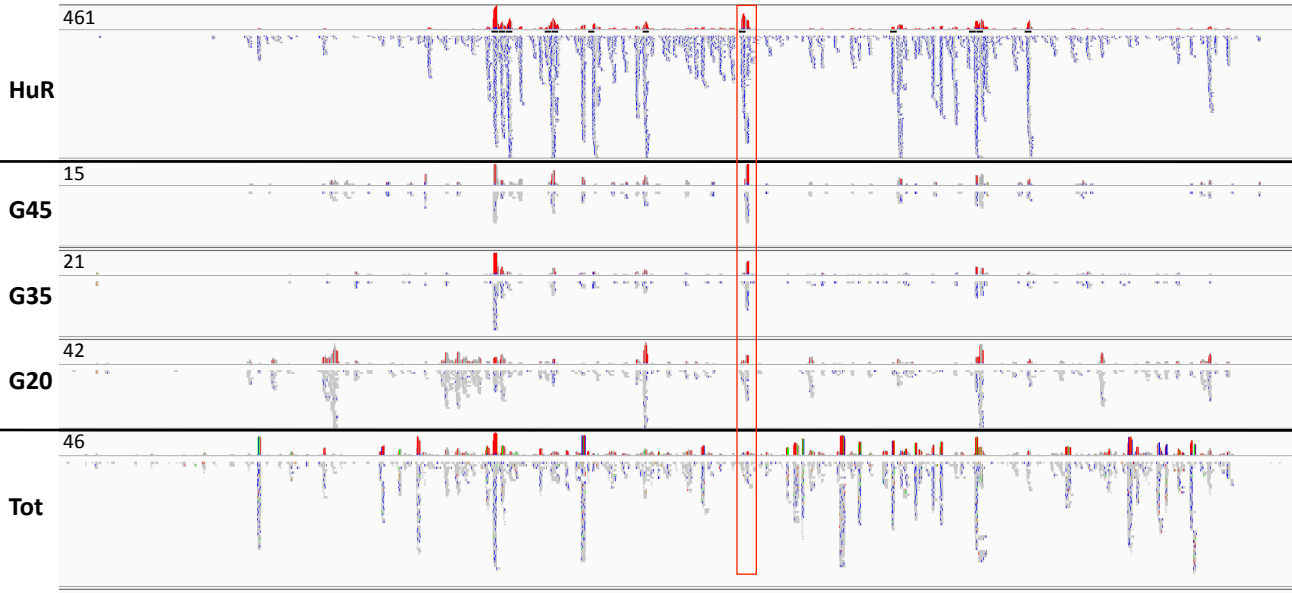

Supplement: gb-2014-15-1-r2-S3.pdf [file gb-2014-15-1-r2-S3.pdf]
