# Supplementary material for: Advancing the functional utility of PAR-CLIP by quantifying background binding to mRNAs and lncRNAs
Source: PubMed Central journal article supplement (PMC4053780; doi:10.1186/gb-2014-15-1-r2), 2014-01-07

# PAR-CLIP library

# MALAT1 lncRNA (full transcript)

Scale

2 kb

hg19

chr11:

| 65267000 | 65268000 | 65269000 | 65270000 | 65271000 | 65272000 | 65273000 |

MALAT1

AGO1-4 PAR-CLIP (Hafner 2010)

ALKBH5 PAR-CLIP (Baltz 2012)

C17ORF85 PAR-CLIP (Baltz 2012)

C22ORF28 PAR-CLIP (Baltz 2012)

CAPRIN1 PAR-CLIP (Baltz 2012)

ELAVL1 PAR-CLIP (Lebedeva 2011)

ELAVL1 PAR-CLIP (Mukherjee 2011)

EWSR1 PAR-CLIP (Hoe11 2011)

FMR1 isoform 1 mutant PAR-CLIP (Ascano 2012)

FMR1 isoform 1 PAR-CLIP (Ascano 2012)

FMR1 isoform 7 mutant PAR-CLIP (Ascano 2012)

FMR1 isoform 7 PAR-CLIP (Ascano 2012)

FUS mutants R521G/R521H PAR-CLIP (Hoe11 2011)

FUS PAR-CLIP (Hoe11 2011)

FXR1 PAR-CLIP (Ascano 2012)

FXR2 PAR-CLIP (Ascano 2012)

hnRNPC iCLIP (Koenig 2010)

IGF2BP1-3 PAR-CLIP (Hafner 2010)

MOV10 PAR-CLIP (Sievers 2012)

PUM2 PAR-CLIP (Hafner 2010)

QKI PAR-CLIP (Hafner 2010)

SF2/ASF CLIP-SEQ (Sanford 2009)

TAF15 PAR-CLIP (Hoe11 2011)

TDP-43 iCLIP (Tollervey 2011)

TIA1 iCLIP (Wang 2010)

TIAL1 iCLIP (Wang 2010)

ZC3H7B PAR-CLIP (Baltz 2012)

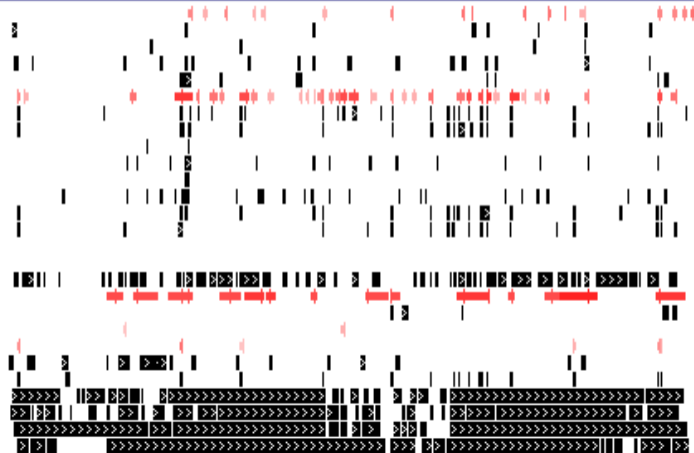

Supplement: gb-2014-15-1-r2-S67.pdf [file gb-2014-15-1-r2-S67.pdf]
