# Supplementary material for: Advancing the functional utility of PAR-CLIP by quantifying background binding to mRNAs and lncRNAs
Source: PubMed Central journal article supplement (PMC4053780; doi:10.1186/gb-2014-15-1-r2), 2014-01-07

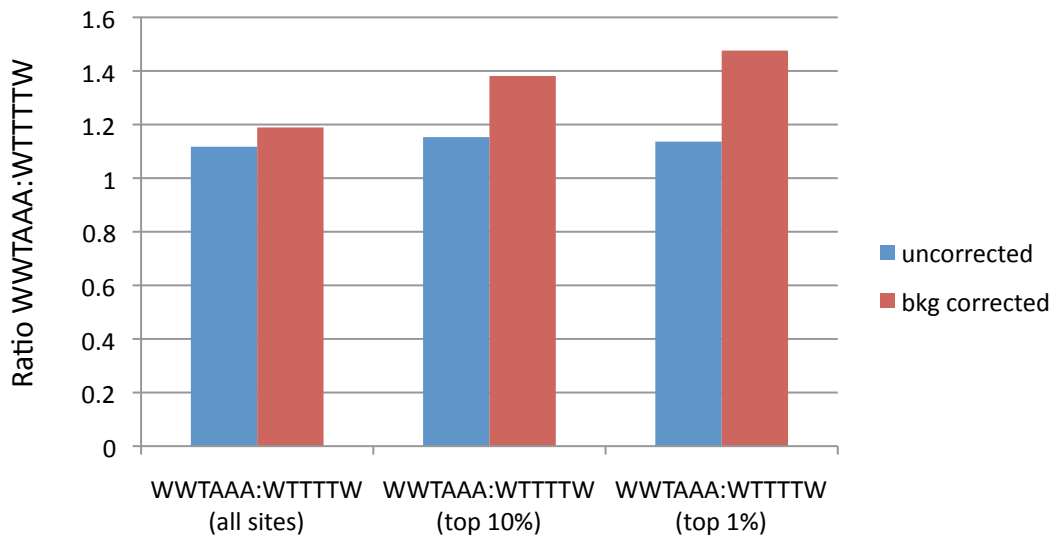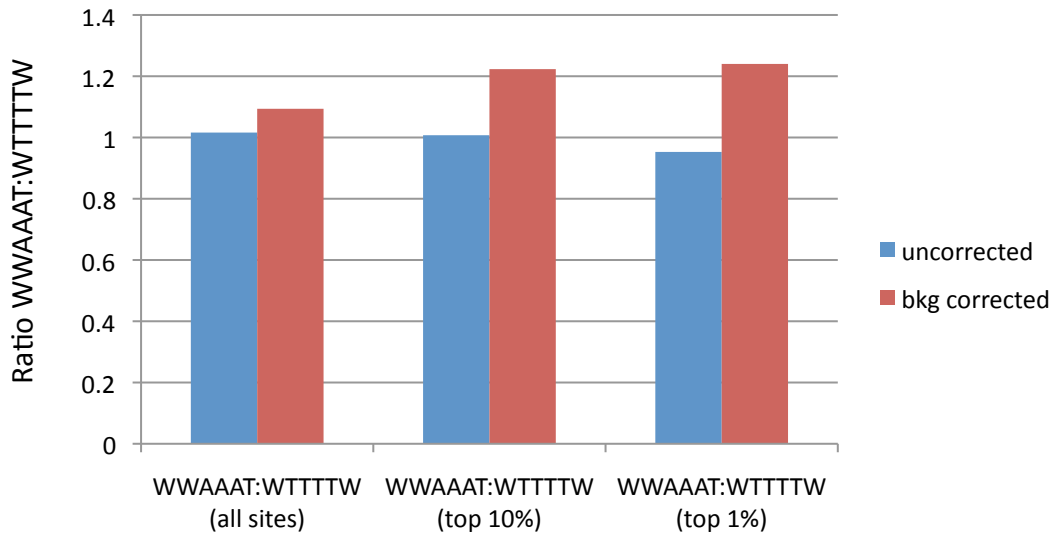

Supplement: gb-2014-15-1-r2-S70.pdf [file gb-2014-15-1-r2-S70.pdf]
